# Supplementary material
Source: PubMed Central journal article supplement (PMC3094772)
Supplement: NIHMS289646-supplement-Supplementary_figure.pdf [file NIHMS289646-supplement-Supplementary_figure.pdf]

Original Signal  
distributions

Evidence Variable  
 $S_{LFP}$  distributions:

A1 LFP  
recording  
(Cell2, R2)

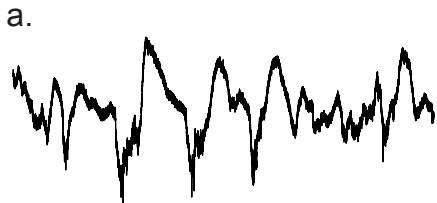

White  
noise

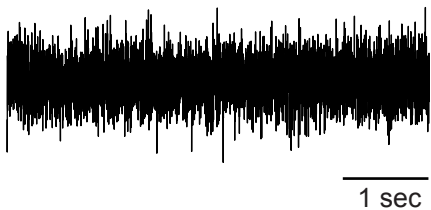

<2 Hz, 2-4 Hz  
without 'L/(H+L)'

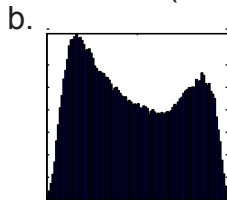

<2 Hz, 2-4 Hz  
with 'L/(H+L)'

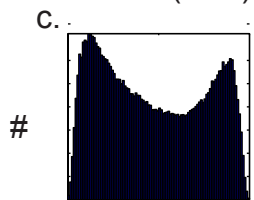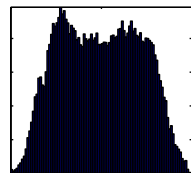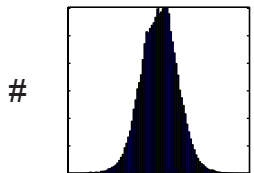

$S_{LFP}$

$S_{LFP}$
